# Supplementary material for: A dual-emission fluorescence coordination polymer for simultaneous quantification of Al3+ and Pb2+ in their mixtures
Source: Royal Society of Chemistry journal article supplement (doi:10.1039/d4tc02873b), 2024-01-01
Supplement: d4tc02873b1.pdf [file d4tc02873b1.pdf]

## Supporting Information

### **Dual-Emission Fluorescence Coordination Polymer for Simultaneous Quantification of Al<sup>3+</sup> and Pb<sup>2+</sup> in Their Mixtures**

*Xiaomei Wang, Yufen Li, Lanqing Liu, Zhenqi Tan, Xinhui Zhou,\* Yujian You, Shi Wang*

State Key Laboratory of Organic Electronics and Information Displays & Institute of Advanced  
Materials (IAM), Nanjing University of Posts & Telecommunications, Nanjing 210023, China

E-mail addresses: \*iamxhzhou@njupt.edu.cn (X. Zhou)

## Instrumentation

A Bruker D8-advance X-ray diffractometer equipped with Cu-K $\alpha$  ( $\lambda = 1.5418 \text{ \AA}$ ) radiation was used to obtain PXRD data collected in the 5–50° range of  $2\theta$  with a scan step width of 0.02°. Photoluminescence spectra were obtained using an RF-6000 Plus fluorescence spectrophotometer. The UV–Vis absorption spectra of the samples were collected using a PerkinElmer Lambda 35. The fluorescence lifetime curves were obtained using an Edinburgh FLS920 spectrophotometer. X-ray photoelectron spectroscopy (XPS) was acquired by X-ray photoelectron spectroscopy (Axis Supra) with Al K $\alpha$  radiation. An inductively coupled plasma mass spectrometer (ICP-MS) (NEXION 2000, PerkinElmer) was used for obtaining the concentrations of Al $^{3+}$  and Pb $^{2+}$ .

**Table S1.** Sensing performance of different materials toward Al $^{3+}$  ions

| Al $^{3+}$ sensors                                                 | LOD            | Reference         |
|--------------------------------------------------------------------|----------------|-------------------|
| <b>1</b>                                                           | <b>33.8 nM</b> | <b>This study</b> |
| {[InZn $_2$ (cbda) $_2$ (H $_2$ O) $_2$ ](NMF) $_3$ } $_n$         | 0.56 $\mu$ M   | Ref $^{[1]}$      |
| [Eu(atpt) $_{1.5}$ (phen)(H $_2$ O)] $_n$                          | 10 $\mu$ M     | Ref $^{[2]}$      |
| {[Tb(Cmdcp)(H $_2$ O) $_3$ ] $_2$ (NO $_3$ ) $_2$ ·5H $_2$ O} $_n$ | 6.6 $\mu$ M    | Ref $^{[3]}$      |
| [Zn(NH $_2$ -bdc)(4,4'-bpy)]                                       | 30 nM          | Ref $^{[4]}$      |
| UiO-(OH) $_2$ @RhB                                                 | 10 nM          | Ref $^{[5]}$      |
| {Zn(Dpada)(Imdba)·H $_2$ O} $_n$                                   | 0.69 $\mu$ M   | Ref $^{[6]}$      |
| Eu-BDC-NH $_2$ /TDA                                                | 0.14 $\mu$ M   | Ref $^{[7]}$      |
| [Zn(H $_2$ dhbdc)(Cz-3,6-bpy)] $_n$                                | 0.62 $\mu$ M   | Ref $^{[8]}$      |

LOD: limit of detection; H $_4$ cbab: 5,5'-(carbonylbis(azanediyl))-diisophthalic acid;

NMF: *N*-methylformamide; H $_2$ atpt: 2-aminoterephthalic acid;

phen: 1,10-phenanthroline; H $_3$ CmdcpBr: *N*-carboxymethyl-(3,5-dicarboxyl)pyridinium bromide

NH $_2$ -H $_2$ bdc: 2-amino-1,4-benzenedicarboxylic acid; 4,4'-bpy: 4,4'-bipyridine

RhB: rhodamine B; Dpada: 3, 6-di(1*H*-imidazol-1-yl) pyridazine

Imdba: 2, 2'-iminodibenzoic acid; BDC-NH $_2$ : 2-aminoterephthalic acid;

TDA: 2,5-thiophenedicarboxylic acid; H $_4$ dhbdc: 2,5-dihydroxyterephthalic acid;

Cz-3,6-bpy: 3,6-bis(pyridin-4-yl)-9*H*-carbazole

**Table S2.** Sensing the performance of different materials toward  $\text{Pb}^{2+}$  ions

| $\text{Pb}^{2+}$ sensors                        | LOD                | Reference           |
|-------------------------------------------------|--------------------|---------------------|
| <b>1</b>                                        | <b>30.0 nM</b>     | <b>This study</b>   |
| $\text{NH}_2\text{-Ni-MOF}$                     | 0.2 nM             | Ref <sup>[9]</sup>  |
| MOF-5- $\text{NH}_2$                            | 0.25 $\mu\text{M}$ | Ref <sup>[10]</sup> |
| $\text{Zn}_4\text{O}(\text{TPA})_3$             | 2 nM               | Ref <sup>[11]</sup> |
| $[\text{Tb}(\text{L})(\text{H}_2\text{O})_5]_n$ | 0.1 $\mu\text{M}$  | Ref <sup>[12]</sup> |
| Co-TMC4R- BDC                                   | 11 nM              | Ref <sup>[13]</sup> |

MOF: Metal Organic Framework; TPA: terephthalic acid;

$\text{H}_2\text{L}^-$ : 3, 5-dicarboxy-phenol anion ligand;

TMC4R: tetra(4-mercaptopyridine)calix[4]resorcinarene; 1,4-BDC: 1,4-benzenedicarboxylic acid

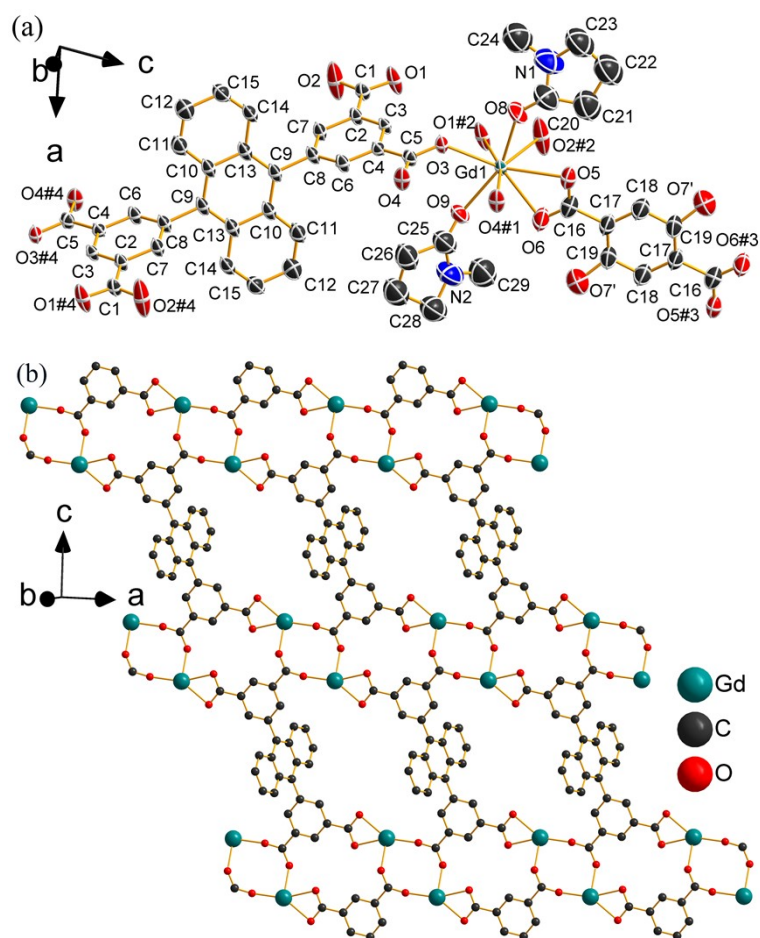

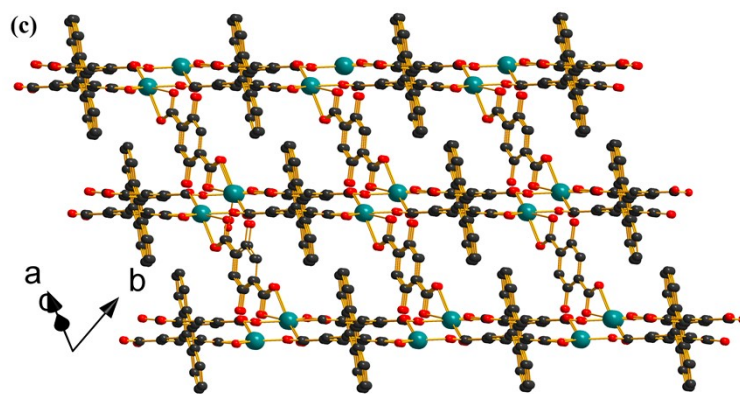

**Fig. S1** (a) Under the thermal ellipsoids drawn at the 50% probability level, the asymmetric unit of **1**. (b) The 2D coordination network is located on (111) crystal plane. (c) The 3D framework of **1**. For clarity, all hydrogen atoms in (a), (b), (c), and NMP molecules in (b), (c) are omitted.

Symmetry codes: #<sup>1</sup>-x+2, -y, -z+1; #<sup>2</sup>-x+1, -y+1, -z+1; #<sup>3</sup>-x+2, -y, -z+2; #<sup>4</sup>-x+2, -y+1, -z.

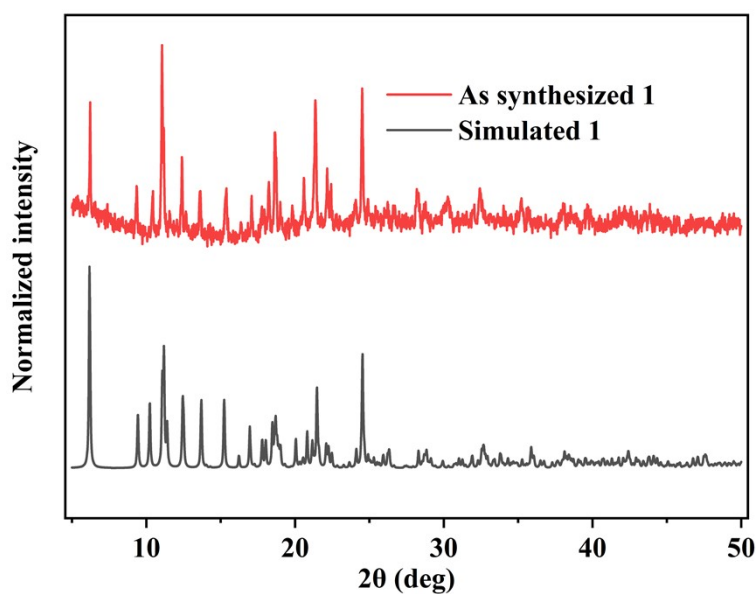

**Fig. S2** The PXRD patterns of **1**.

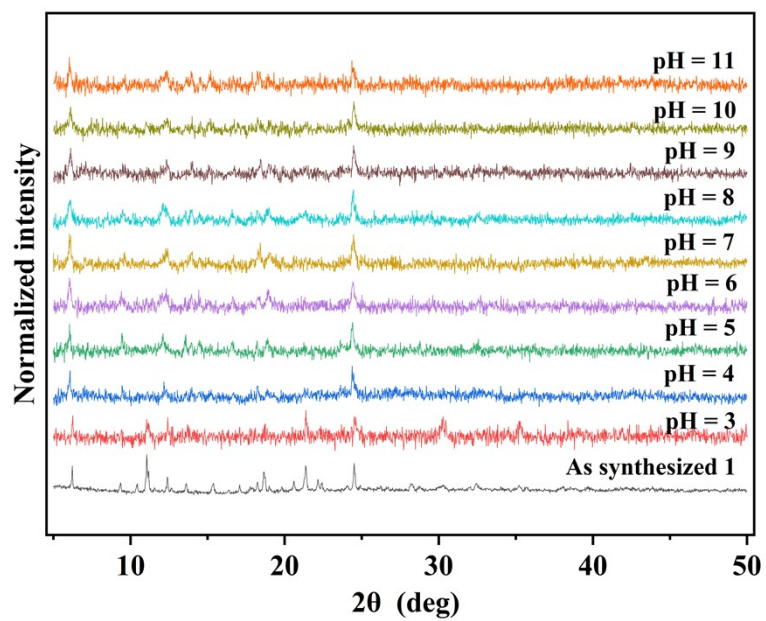

**Fig. S3** PXRD diagram of **1** in different pH values.

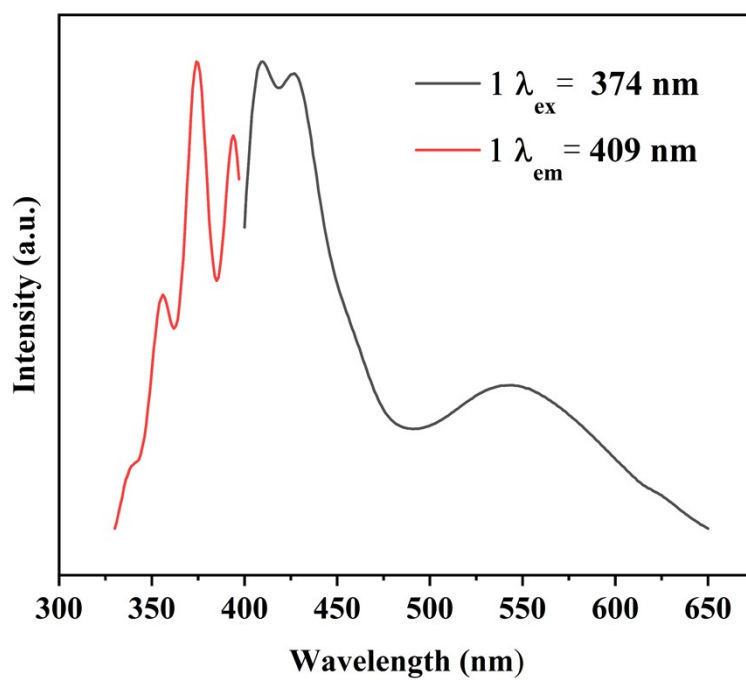

**Fig. S4** Excitation and emission spectra of **1** in aqueous solution.

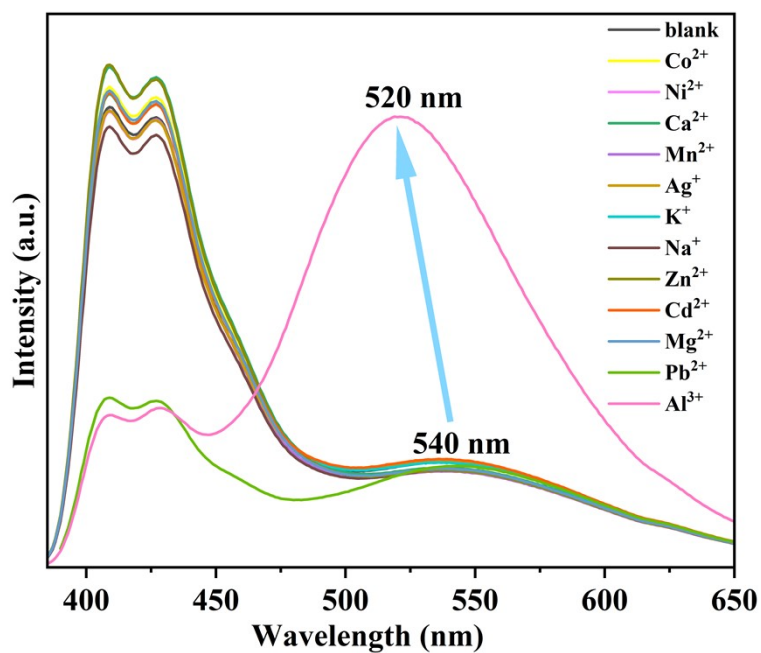

**Fig. S5** Fluorescence intensity selectivity of 1-H<sub>2</sub>O suspension adding 9  $\mu$ M different metal ions upon excitation at 374 nm

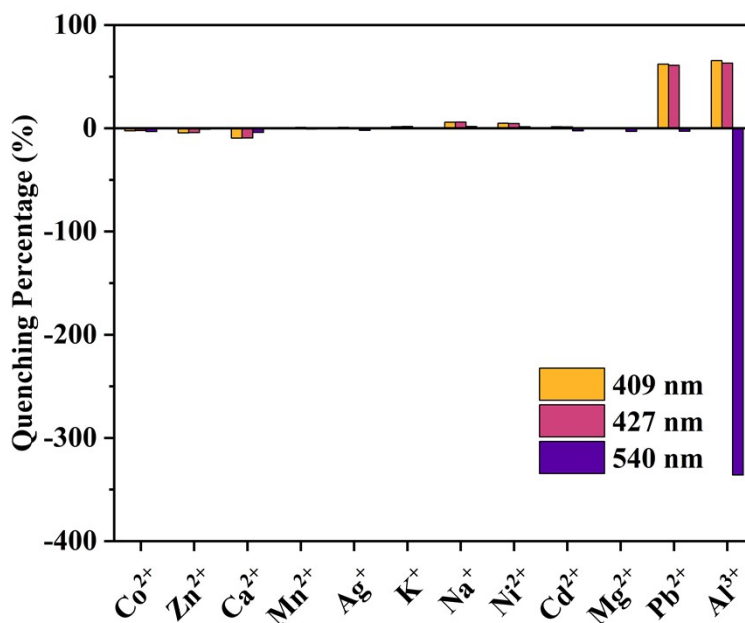

**Fig. S6** Fluorescence quenching percentages of 1-H<sub>2</sub>O suspension for the intensities of emission peaks at 409, 427, and 540 nm after the addition of different kinds of metal ions (9  $\mu$ M) upon excitation at 374 nm.

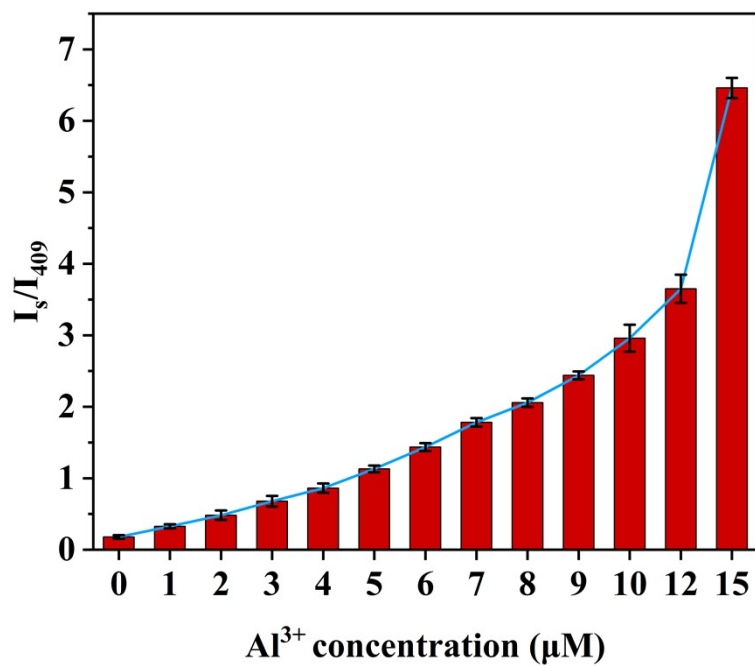

**Fig. S7** Plot of  $I_s/I_{409}$  values at different concentrations of  $Al^{3+}$  ions

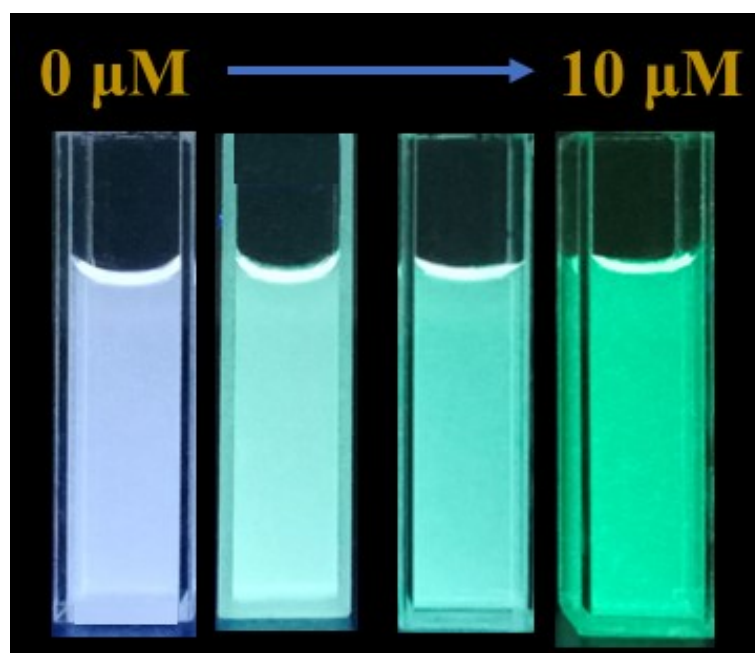

**Fig. S8** Photographs of **1**-H<sub>2</sub>O after adding different concentrations of  $Al^{3+}$  ions under UV-light irradiation at 365 nm

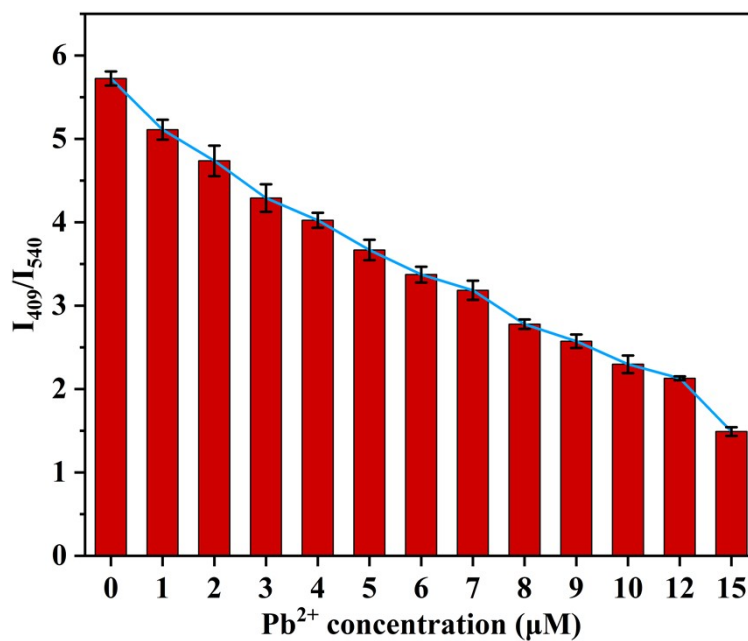

Fig. S9 Plot of  $I_{409}/I_{540}$  values at different concentrations of  $Pb^{2+}$  ions.

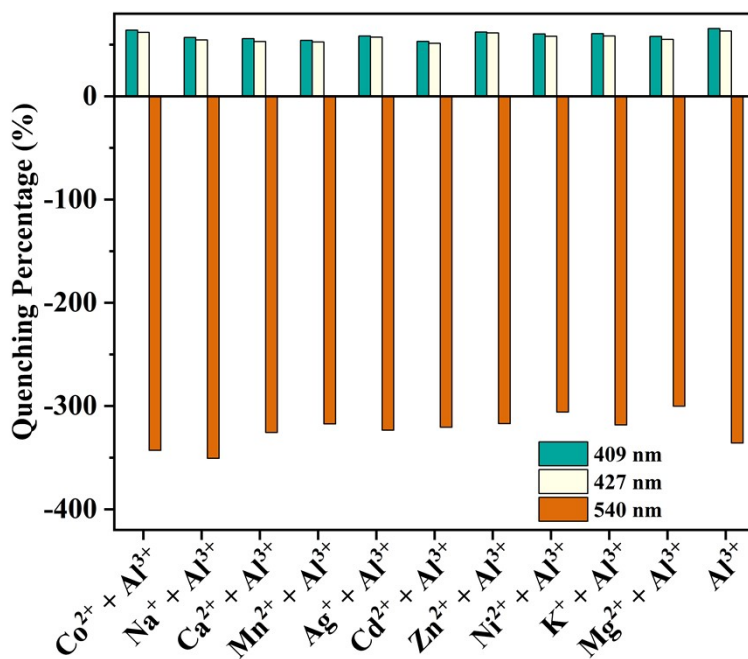

Fig. S10 Quenching percentage when 1-H<sub>2</sub>O suspension is treated with Al<sup>3+</sup> (9 μM) and other interfering ions (90 μM)



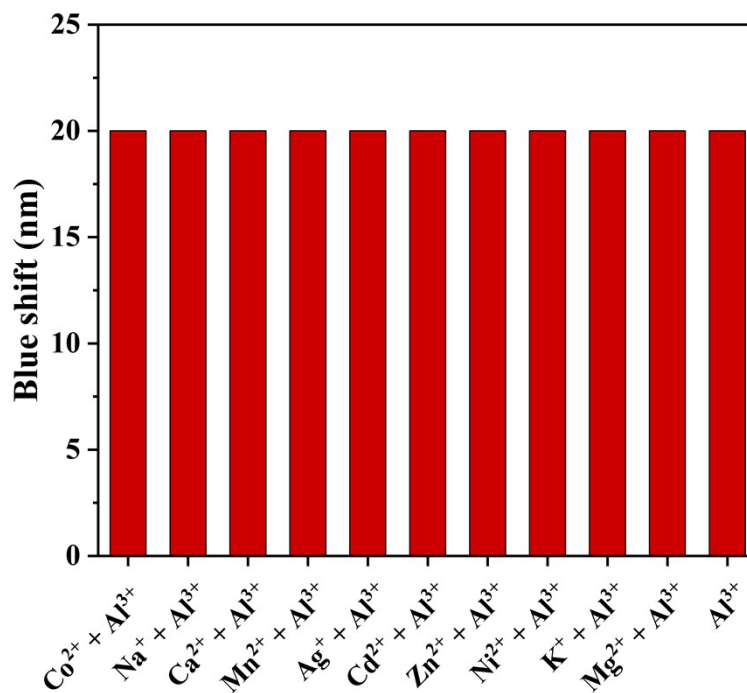

**Fig. S11** Blue shift of 1-H<sub>2</sub>O suspension treated with Al<sup>3+</sup> (9 μM) and other interfering ions (90 μM) upon excitation at 374 nm

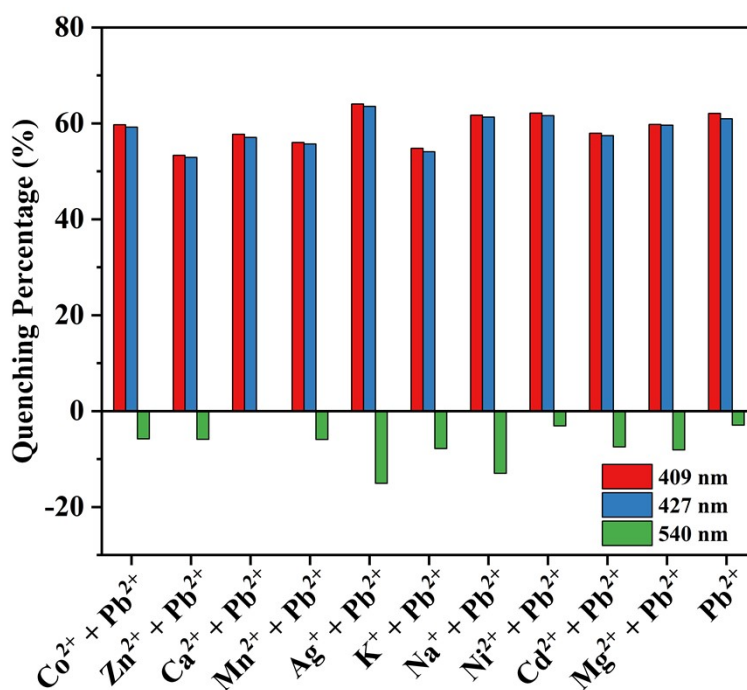

**Fig. S12** Quenching percentage of 1-H<sub>2</sub>O suspension treated with Pb<sup>2+</sup> (9 μM) and other interfering ions (90 μM)

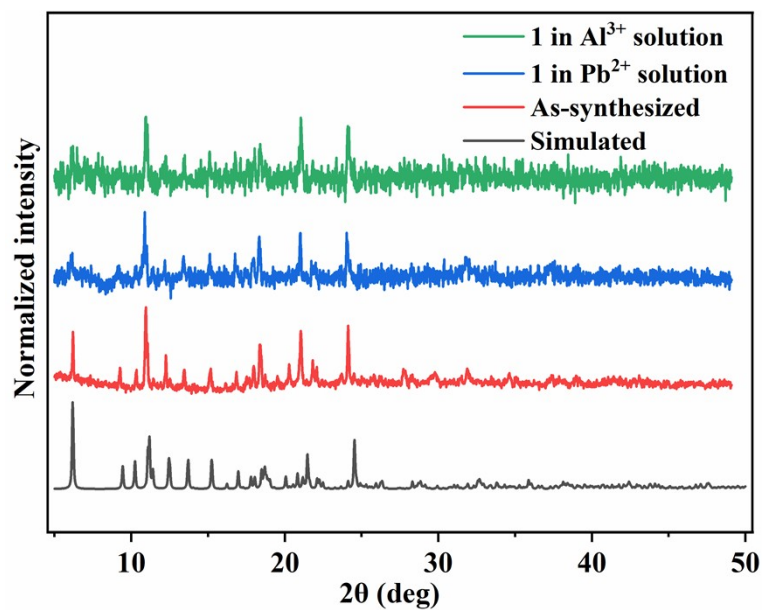

**Fig. S13** Powder X-ray diffraction (PXRD) patterns of **1** in solutions containing  $\text{Al}^{3+}$  and  $\text{Pb}^{2+}$  ions

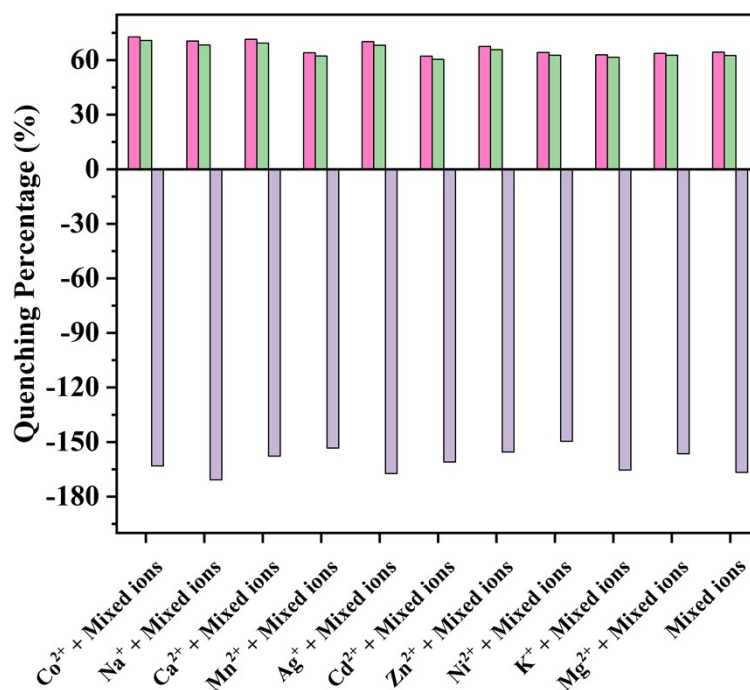

**Fig. S14** Fluorescence quenching percentages of **1**- $\text{H}_2\text{O}$  suspension treated with mixed ions (9  $\mu\text{M}$ ) and other interfering ions (90  $\mu\text{M}$ )

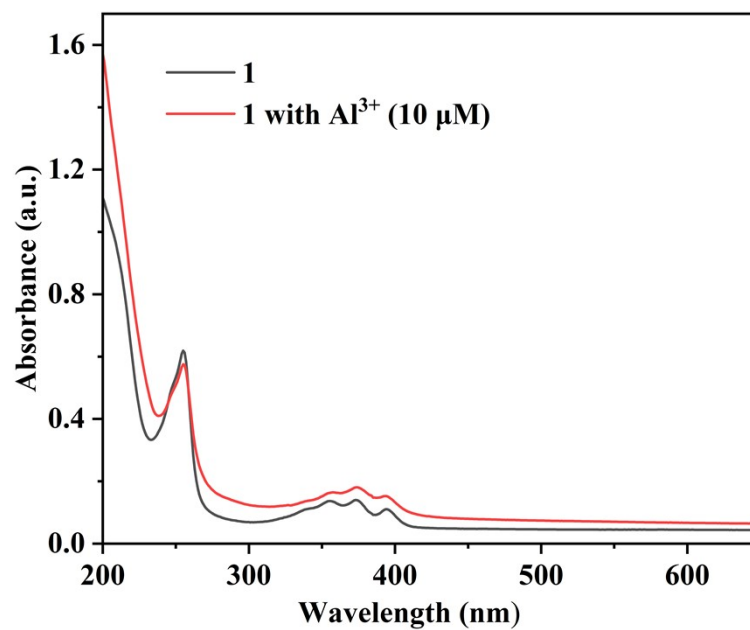

**Fig. S15** UV absorption intensity of **1**-H<sub>2</sub>O suspension after adding Al<sup>3+</sup> ions

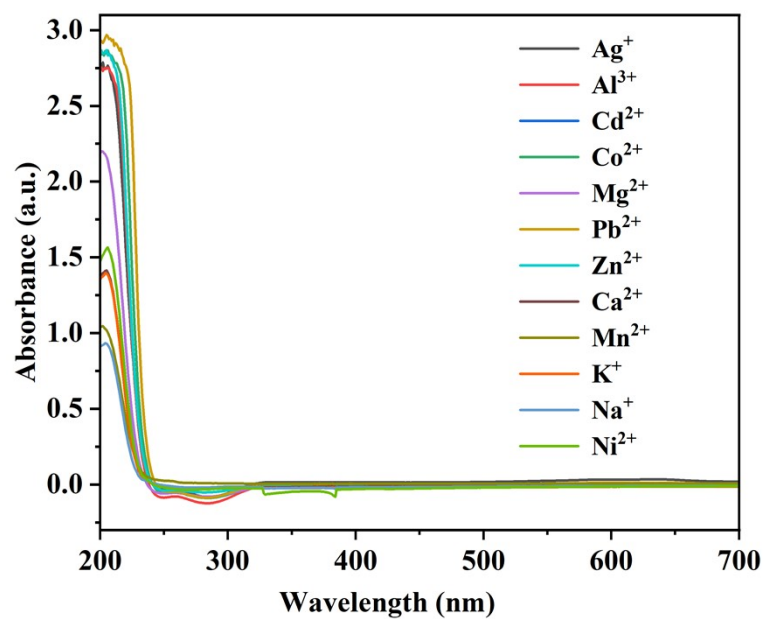

**Fig. S16** UV absorption intensity of **1**-H<sub>2</sub>O suspension after adding different metal ions

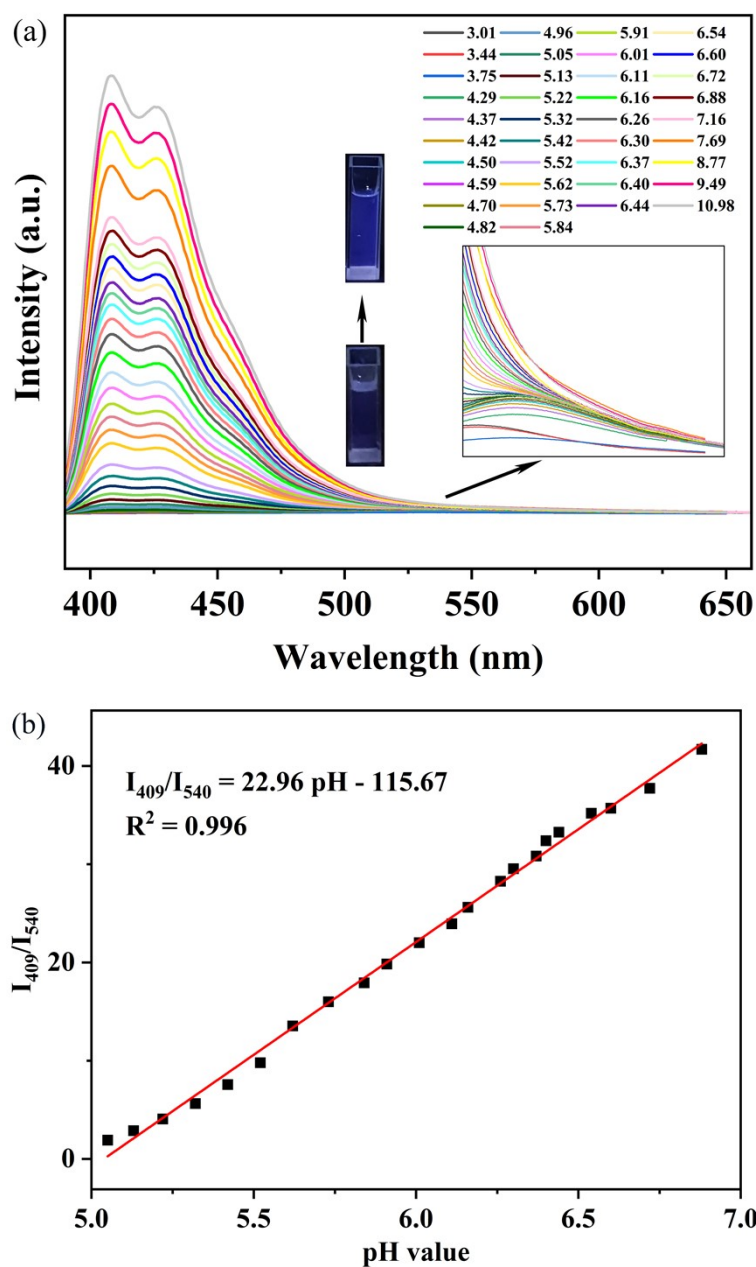

**Fig. S17** (a) Emission spectra of 1-H<sub>2</sub>O suspension in the pH range of 3.01-10.98; inset: changes in luminescence intensity visible to the naked eye at pH 5.05-6.88 under 365 nm UV light. (b) The linear relationship between pH value and  $I_{409}/I_{540}$  (excited at 374 nm).

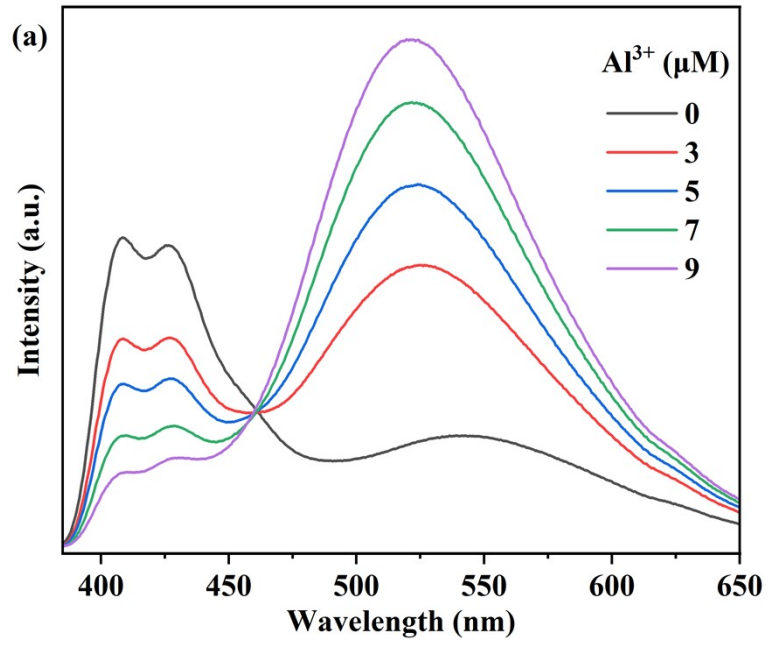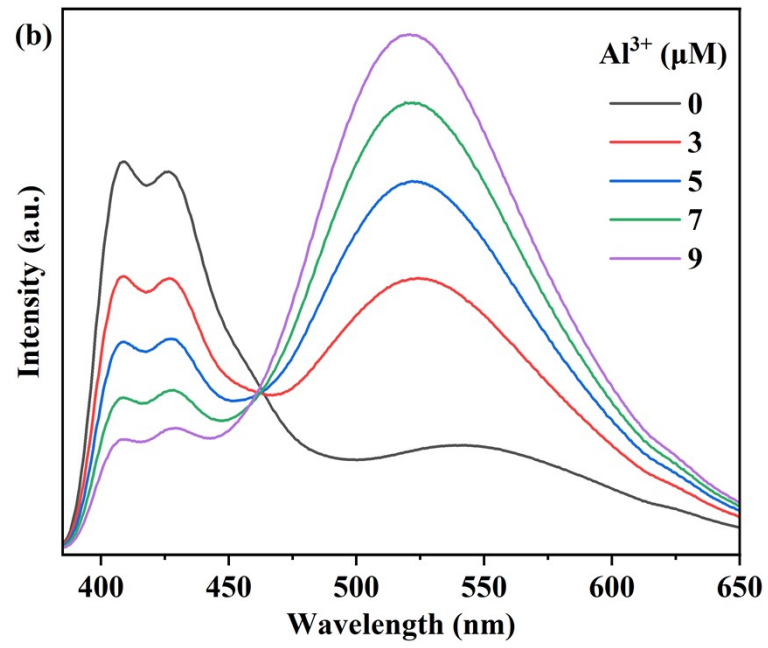

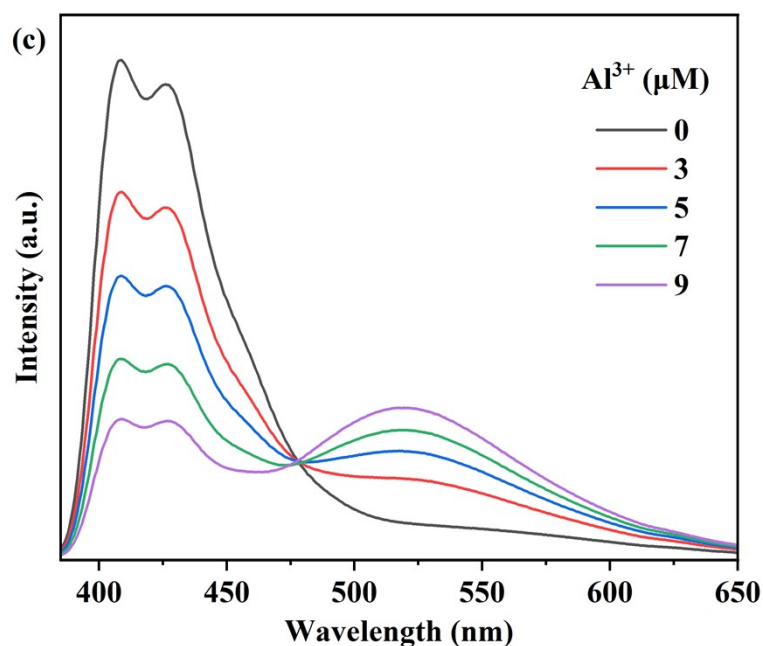

**Fig. S18** Emission spectra of 1-H<sub>2</sub>O suspension with different concentrations of Al<sup>3+</sup> ions at (a) pH = 5.23, (b) pH = 5.31, (c) pH = 5.60

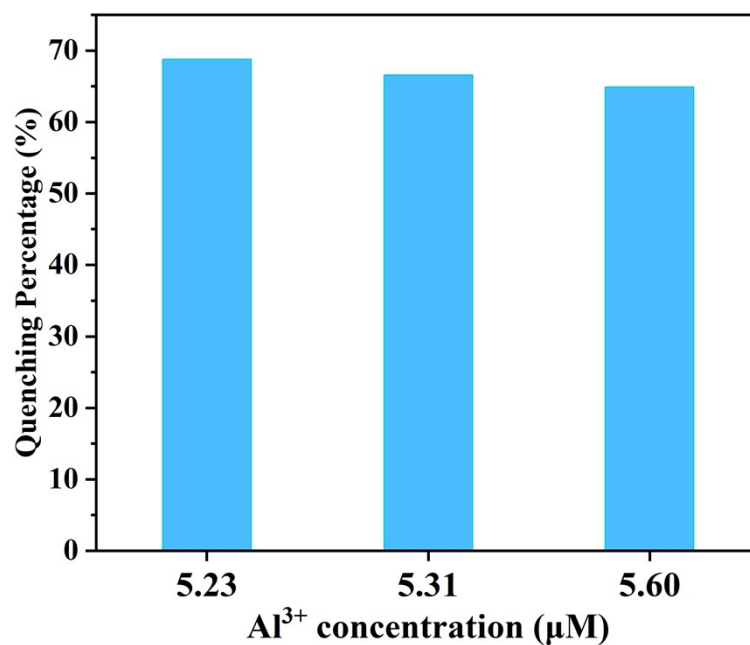

**Fig. S19** Fluorescence quenching percentages of 1-H<sub>2</sub>O suspension for the intensities of emission peaks at 409 nm after the addition of different concentrations of Al<sup>3+</sup> ions at different pH values upon excitation at 374 nm

## References

- [1] Y.-Y. Hou, L.-B. Zhou, C.-F. Meng, J. Guan, G.-L. Zhang, Y.-Z. Hou, *J. Clust. Sci.*, 2020, **31**, 1285-1293.
- [2] Y. Kang, X.-J. Zheng, L.-P. Jin, *J. Colloid Interface Sci.*, 2016, **471**, 1-6.
- [3] M. Chen, K.-Y. Wu, W.-L. Pan, N.-H. Huang, R.-T. Li, J.-X. Chen, *Spectrochim. Acta. A Mol. Biomol. Spectrosc.*, 2021, **247**, 119084.
- [4] T. Wiwasuku, J. Othong, J. Boonmak, V. Ervithayasuporn, S. Youngme, *Dalton Trans.*, 2020, **49**, 10240-10249.
- [5] X. Zheng, Y. Zhao, P. Jia, Q. Wang, Y. Liu, T. Bu, M. Zhang, F. Bai, L. Wang, *Inorg. Chem.*, 2020, **59**, 18205-18213.
- [6] Q. Li, S. Xu, L. He, K. Huang, X. Zhang, D. Qin, *Spectrochim. Acta. A Mol. Biomol. Spectrosc.*, 2022, **279**, 121461.
- [7] R. Wang, H. Zhang, Si. Wang, F. Meng, J. Sun, D. Lou, Z. Su, *Inorg. Chem. Front.*, 2023, **10**, 1534-1542.
- [8] W.-T. Chen, M.-J. Tsai, J.-Y. Wu, *Cryst. Growth Des.*, 2022, **22**, 228-236.
- [9] J. Wan, Y. Shen, L. Xu, R. Xu, J. Zhang, H. Sun, C. Zhang, C. Yin, X. Wang, *J. Electroanal. Chem.*, 2021, **895**, 115374.
- [10] X. An, Q. Tan, S. Pan, H. Liu, X. Hu, *Spectrochim. Acta. A Mol. Biomol. Spectrosc.*, 2021, **247**, 119073.
- [11] S. Xu, L. Zhan, C. Hong, X. Chen, X. Chen, M. Oyama, *Sens. Actuators B Chem.*, 2020, **308**, 127733.
- [12] G. Ji, J. Liu, X. Gao, W. Sun, J. Wang, S. Zhao, Z. Liu, *J. Mater. Chem. A*, 2017, **5**, 10200-10205.
- [13] F.-F. Wang, C. Liu, J. Yang, H.-L. Xu, W.-Y. Pei, J.-F. Ma, *Chem. Eng. J.*, 2022, **438**, 135639.
